# Supplementary material for: Effects of structural disorder and nitrogen content on the oxygen reduction activity of polyvinylpyrrolidone-derived multi-doped carbon
Source: Royal Society of Chemistry journal article supplement (doi:10.1039/c5ta02097b), 2015-01-01
Supplement: c5ta02097b1.pdf [file c5ta02097b1.pdf]

## Supplementary information for the manuscript

“Effects of structural disorder and nitrogen content on oxygen reduction activity of polyvinylpyrrolidone-derived multi-doped carbon”

### 1. Oxygen reduction reaction activity in alkaline media:

Figure S1 exhibits the CV scans of as-synthesized CN<sub>x</sub> modified GC electrodes in Ar (dotted curves) and O<sub>2</sub> (solid curve) saturated 0.1 M KOH electrolyte. The cathodic peak around -0.4 V vs Ag/AgCl (1.0 M KCl) disappear in absence of O<sub>2</sub>, suggesting its origin to be the oxygen reduction reaction. Similarly, Figure S2 exhibits the CV scans of acid-treated CN<sub>x</sub> modified GC electrodes in Ar (dotted curves) and O<sub>2</sub> saturated 0.1 M KOH electrolyte.

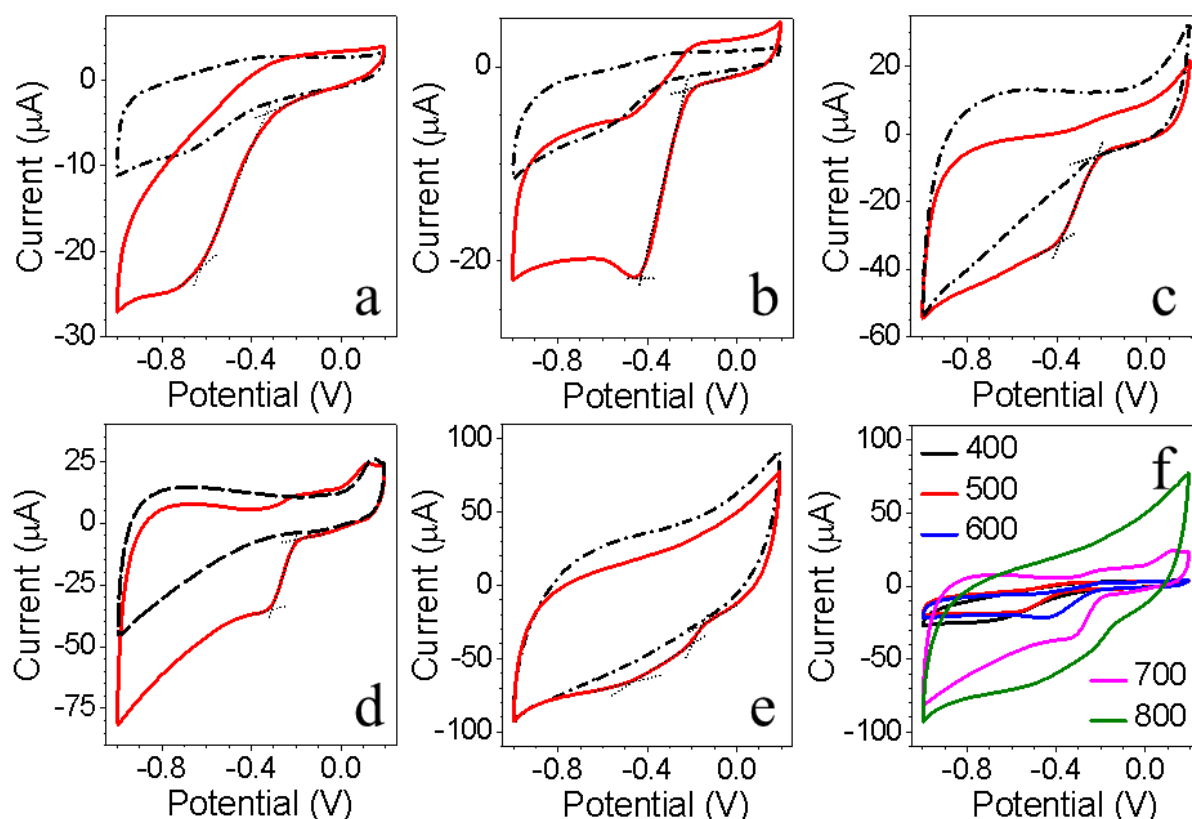

**Figure S1:** Cyclic voltammograms of as-synthesized CN<sub>x</sub> in O<sub>2</sub> (solid curves) and Ar (dashed curves) saturated aqueous 0.1 mol L<sup>-1</sup> KOH electrolyte for (a) CN<sub>x</sub>/400, (b) CN<sub>x</sub>/600, (c) CN<sub>x</sub>/600, (d) CN<sub>x</sub>/700 and (e) CN<sub>x</sub>/800 measured at a scan rate of 50 mV/s. (f) CV curves of CN<sub>x</sub> in O<sub>2</sub> saturated KOH plotted at same Y-scale.

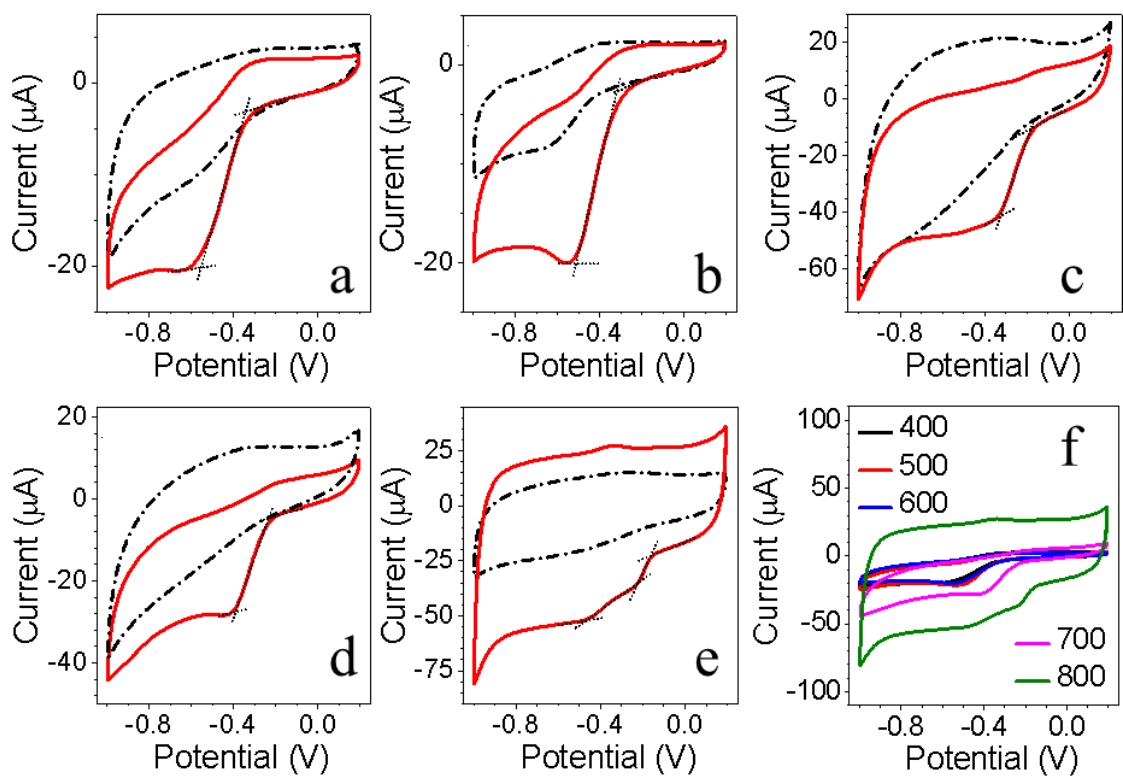

**Figure S2:** Cyclic voltammograms of A/CN<sub>x</sub> in O<sub>2</sub> (solid red curves) and Ar (dashed black curves) saturated aqueous 0.1 mol L<sup>-1</sup> KOH electrolyte for (a) A/CN<sub>x</sub>/400, (b) A/CN<sub>x</sub>/600, (c) A/CN<sub>x</sub>/600, (d) A/CN<sub>x</sub>/700 and (e) A/CN<sub>x</sub>/800 measured at a scan rate of 50 mV/s. (f) CV curves of A/CN<sub>x</sub> in O<sub>2</sub> saturated KOH plotted at same Y-scale.

## 2. Methanol oxidation reaction activity in acidic media:

Figure S3 shows the CV scans for as-synthesized as well as acid-treated  $\text{CN}_x$  in an electrolyte containing 1.0 M  $\text{H}_2\text{SO}_4$  and 1.0 M  $\text{CH}_3\text{OH}$  at a scan rate of  $50 \text{ mV s}^{-1}$ . Anodic peak around 0.7 V vs Ag/AgCl (1.0 M KCl) corresponds to the methanol oxidation reaction.

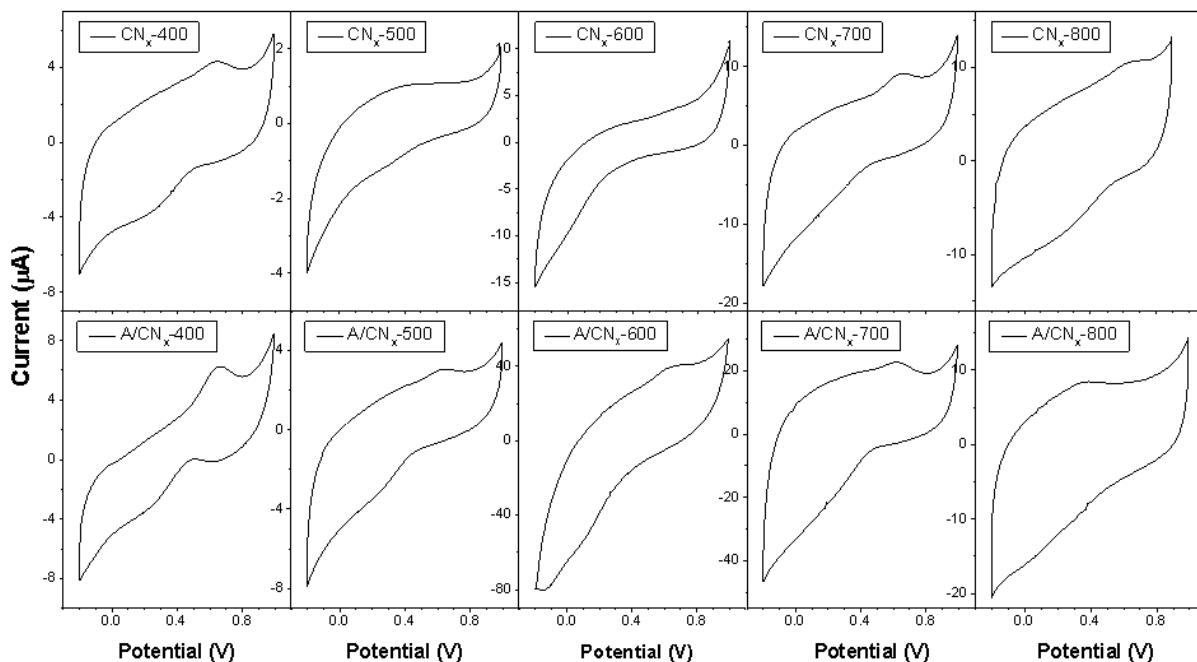

**Figure S3:** Cyclic voltammograms in an electrolyte containing 1.0 M  $\text{H}_2\text{SO}_4$  and 1.0 M  $\text{CH}_3\text{OH}$  at a scan rate of  $50 \text{ mV s}^{-1}$  for as-synthesized as well as acid-treated  $\text{CN}_x$  synthesized at  $T_p$  of 400, 500, 600, 700 and 800 °C. The anodic peaks at  $\sim 0.7 \text{ V}$  exhibits the methanol oxidation reaction.
